# Supplementary material for: The Role of NAD+ in Regenerative Medicine
Source: PubMed Central journal article supplement — Plast Reconstr Surg. 2021 Sep 28;150(4 Suppl):41S–48S. doi: 10.1097/PRS.0000000000009673 (PMC9512238; doi:10.1097/prs.0000000000009673), 2021-09-28
Supplement: prs-150-41s-s001.pdf [file prs-150-41s-s001.pdf]

| DESIGN                                                                                         | INTERVENTION                                                                                                                   | % NAD+ INCREASE                                                                                                                                        | NOTABLE OUTCOMES                                                                                                | STUDY REFERENCE |
|------------------------------------------------------------------------------------------------|--------------------------------------------------------------------------------------------------------------------------------|--------------------------------------------------------------------------------------------------------------------------------------------------------|-----------------------------------------------------------------------------------------------------------------|-----------------|
| Randomized, double-blind, crossover study<br><br>(12 healthy participants)                     | NR (Nicotinamide Riboside) oral<br>Single dose<br>100mg, 300mg, 1000mg                                                         | 100mg = 48%<br>300mg = 59%<br>1000mg = 92%<br>(AUC increase from baseline)<br><br>Measured in peripheral blood mononuclear cells (PBMCs)               | NR safe and well tolerated                                                                                      | 1               |
| Non-randomised, open-label, non-placebo controlled study<br><br>(8 healthy participants)       | NR oral<br>Dose-escalation<br>8 days<br>250 mg (Day 1, 2),<br>500 mg (Day 3, 4),<br>1000 mg (Day 5, 6), and 2000 mg (Day 7, 8) | 35-168%<br>(lowest vs. highest responder.<br>Measurement taken on day 9 after final dose of 2000mg NR)<br><br>Measured in whole blood                  | NR safe and well tolerated                                                                                      | 2               |
| Randomized, double-blind, placebo-controlled, crossover study<br><br>(24 healthy participants) | NR oral<br>6 weeks<br>1000mg (2 x 500mg/day)<br>Crossover with placebo                                                         | 60%<br>(compared to baseline)<br><br>Measured in PBMCs                                                                                                 | Non-significant trend towards lower systolic blood pressure and reduced arterial stiffness amongst participants | 3               |
| Randomized, placebo-controlled, double-blinded study<br><br>(115 healthy participants)         | Oral NR + Pterostilbene (PT)<br>8 weeks<br>Placebo or<br>250 mg NR + 50 mg PT or<br>500 mg NR + 100mg PT.                      | 250mg NR + 50mg PT= 40%<br>500mg NR + 100mg PT = 90% (dropping to 55% at 60 days)<br>(compared to placebo and baseline)<br><br>Measured in whole blood | Total and LDL cholesterol levels were increased in NR+PT treated group                                          | 4               |
| Randomized, placebo-controlled, double-blinded study                                           | NR oral<br>8 weeks<br>Placebo<br>100mg or                                                                                      | 100mg = 22%<br>300mg = 51%<br>1000mg = 142                                                                                                             | NR did not increase LDL cholesterol                                                                             | 5               |

|                                                                                                        |                                                                                                                                                                       |                                                                                             |                                                                                                                                                                                  |    |
|--------------------------------------------------------------------------------------------------------|-----------------------------------------------------------------------------------------------------------------------------------------------------------------------|---------------------------------------------------------------------------------------------|----------------------------------------------------------------------------------------------------------------------------------------------------------------------------------|----|
| (133 healthy/overweight participants)                                                                  | 300mg or 1000mg                                                                                                                                                       | (compared to baseline measured after 2 weeks)<br><br>Measured in whole blood                |                                                                                                                                                                                  |    |
| Randomized, double-blind, placebo-controlled, crossover study<br><br>(12 healthy participants)         | NR oral<br>3 weeks<br>1000mg<br>(2x500mg/day)<br>Crossover with placebo                                                                                               | Whole blood = 128%<br>Skeletal muscle = no change detected (compared to placebo)            | No change to mitochondrial bioenergetics<br><br>Reduction in circulating inflammatory cytokines                                                                                  | 6  |
| Randomized, double-blind, placebo-controlled study<br><br>(40 obese/insulin resistant participants)    | NR oral<br>12 weeks<br>Placebo or 2000mg<br>(2x1000mg/day)                                                                                                            | Skeletal muscle = no change detected                                                        | No change to mitochondrial bioenergetics<br><br>14% decrease in NAMPT protein                                                                                                    | 7  |
| Randomized, double-blind, placebo-controlled, crossover study<br><br>(13 obese participants)           | NR oral<br>6weeks<br>1000mg/day<br>Crossover with placebo                                                                                                             | Skeletal muscle = no change detected                                                        | No improvement to insulin sensitivity<br><br>Small but significant improvements to body composition, sleeping metabolic rate, skeletal muscle and acetylcarnitine concentrations | 8  |
| Non-randomised, open-label, non-placebo controlled study<br><br>(4 stage D heart failure participants) | NR oral<br>Dose-escalation<br>250mg twice a day (day 1),<br>500mg twice a day (day 2),<br>1000mg twice a day (from day 3 for 5 to 9 days dependent on patient health) | 55-161% (lowest vs. highest responder, compared to baseline)<br><br>Measured in whole blood | Improved PBMC respiration<br><br>Reduced proinflammatory cytokine gene expression                                                                                                | 9  |
| Randomized, double-blind, placebo-controlled study<br><br>(8 healthy participants)                     | NR oral<br>7 days<br>Placebo or 1000mg                                                                                                                                | Skeletal muscle= no change detected                                                         | No change in mitochondrial adaptation to endurance exercise                                                                                                                      | 10 |

## Supplemental References

1. Trammell SA, Schmidt MS, Weidemann BJ, et al. Nicotinamide riboside is uniquely and orally bioavailable in mice and humans. *Nat Commun.* 2016;7:12948.
2. Airhart SE, Shireman LM, Risler LJ, et al. An open-label, non-randomized study of the pharmacokinetics of the nutritional supplement nicotinamide riboside (NR) and its effects on blood NAD<sup>+</sup> levels in healthy volunteers. *PLoS One.* 2017;12:e0186459.
3. Martens CR, Denman BA, Mazzo MR, et al. Chronic nicotinamide riboside supplementation is well-tolerated and elevates NAD<sup>+</sup> in healthy middle-aged and older adults. *Nat Commun.* 2018;9:1286.
4. Dellinger RW, Santos SR, Morris M, et al. Repeat dose NRPT (nicotinamide riboside and pterostilbene) increases NAD<sup>+</sup> levels in humans safely and sustainably: a randomized, double-blind, placebo-controlled study. *NPJ Aging Mech Dis.* 2017;3:17.
5. Conze D, Brenner C, Kruger CL. Safety and metabolism of long-term administration of NIAGEN (Nicotinamide Riboside Chloride) in a randomized, double-blind, placebocontrolled clinical trial of healthy overweight adults. *Sci Rep.* 2019;9:9772.
6. Elhassan YS, Kluckova K, Fletcher RS, et al. Nicotinamide riboside augments the aged human skeletal muscle NAD<sup>+</sup> metabolome and induces transcriptomic and anti-inflammatory signatures. *Cell Rep.* 2019;28:1717–1728.e6.
7. Dollerup OL, Chubanava S, Agerholm M, et al. Nicotinamide riboside does not alter mitochondrial respiration, content or morphology in skeletal muscle from obese and insulin-resistant men. *J Physiol.* 2020;598:731–754.
8. Remie CME, Roumans KHM, Moonen MPB, et al. Nicotinamide riboside supplementation alters body composition and skeletal muscle acetylcarnitine concentrations in healthy obese humans. *Am J Clin Nutr.* 2020;112:413–426.
9. Zhou B, Wang DD, Qiu Y, et al. Boosting NAD level suppresses inflammatory activation of PBMCs in heart failure. *J Clin Invest.* 2020;130:6054–6063.
10. Stocks B, Ashcroft SP, Joannis S, et al. Nicotinamide riboside supplementation does not alter whole-body or skeletal muscle metabolic responses to a single bout of endurance exercise. *J Physiol.* 2021;599:1513–1531.
